# Supplementary material
Source: PubMed Central journal article supplement (PMC6352859)
Supplement: izy242_suppl_supplemental_figures_s1-s6.pdf [file izy242_suppl_supplemental_figures_s1-s6.pdf]

Figure S1: Quantity and quality of RNA from biopsies

A

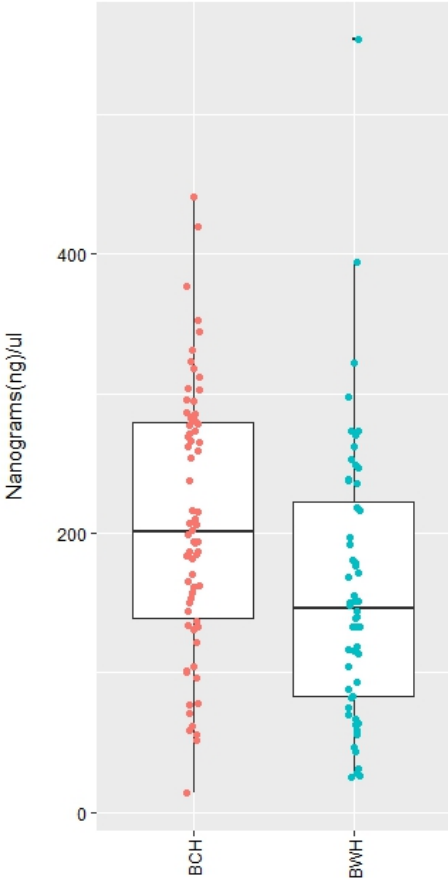

B

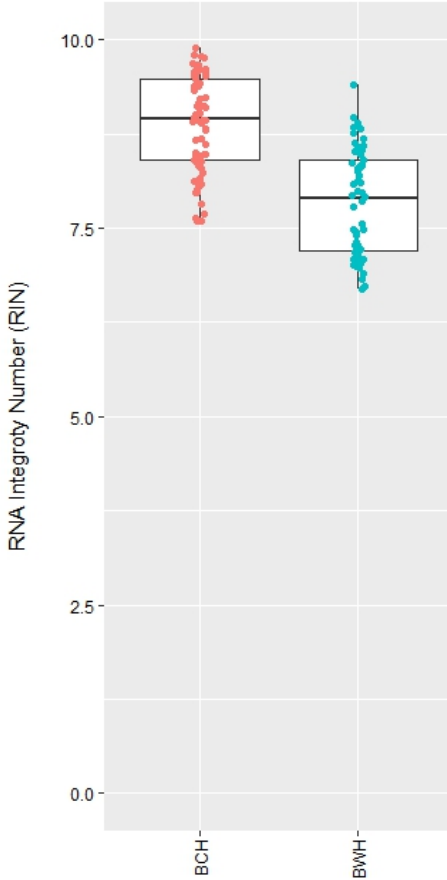

Figure S2: Correlation of UHRR batch controls

A

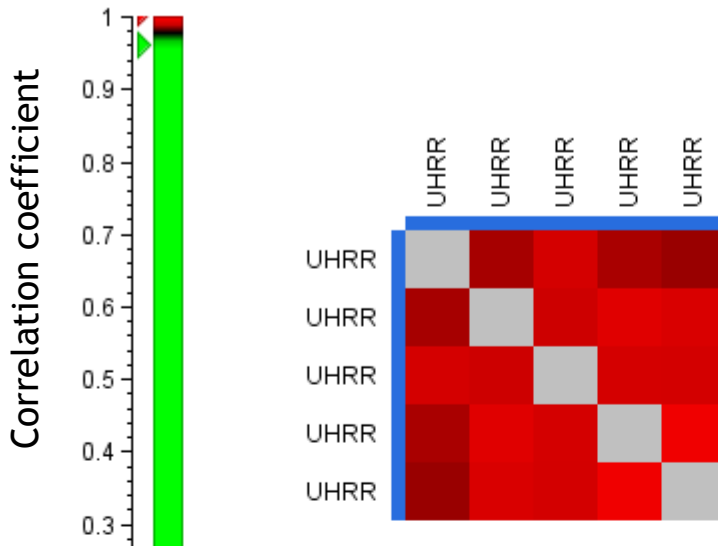

B

Correlation Coefficients

|      | Batch1 Plate 1 | Batch1 Plate 2 | Batch1 Plate 3 | Batch2 Plate 1 | Batch2 Plate 2 |
|------|----------------|----------------|----------------|----------------|----------------|
|      | UHR1           | UHR2           | UHR3           | UHR4           | UHR5           |
| UHR1 | 1              | 0.9906         | 0.9932         | 0.9901         | 0.9894         |
| UHR2 | 0.9906         | 1              | 0.9922         | 0.9943         | 0.9933         |
| UHR3 | 0.9932         | 0.9922         | 1              | 0.9929         | 0.9927         |
| UHR4 | 0.9901         | 0.9943         | 0.9929         | 1              | 0.9974         |
| UHR5 | 0.9894         | 0.9933         | 0.9927         | 0.9974         | 1              |

Figure S3: Microarray Analysis Flow Chart

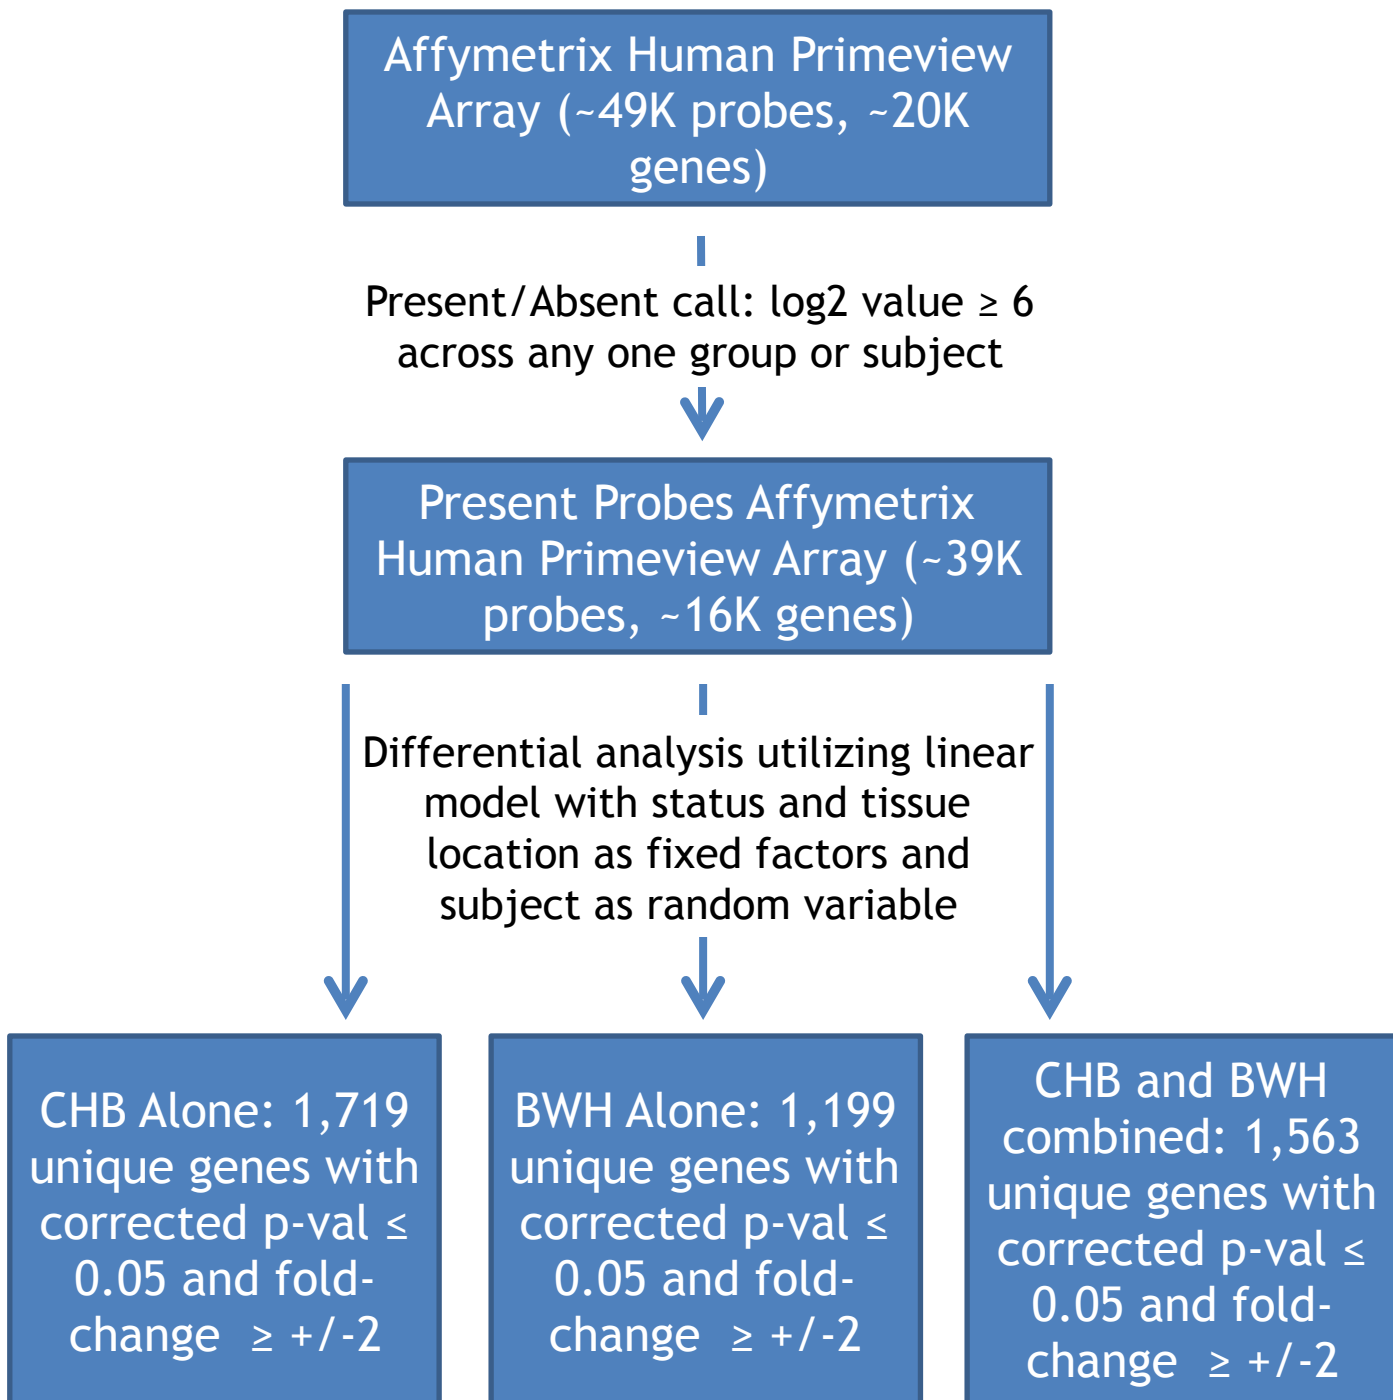

# Figure S4: PCAs denoting Age and Sex

## A

### Shape by age

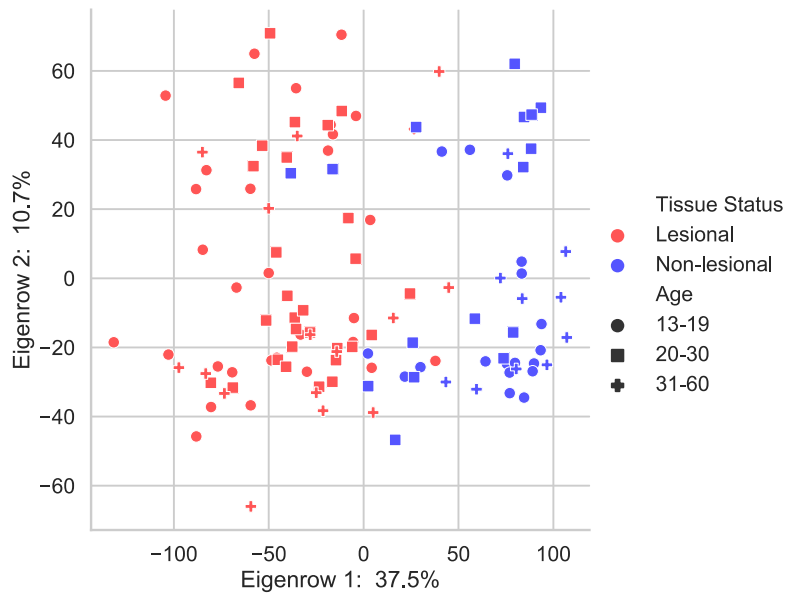

## B

### Shape by sex

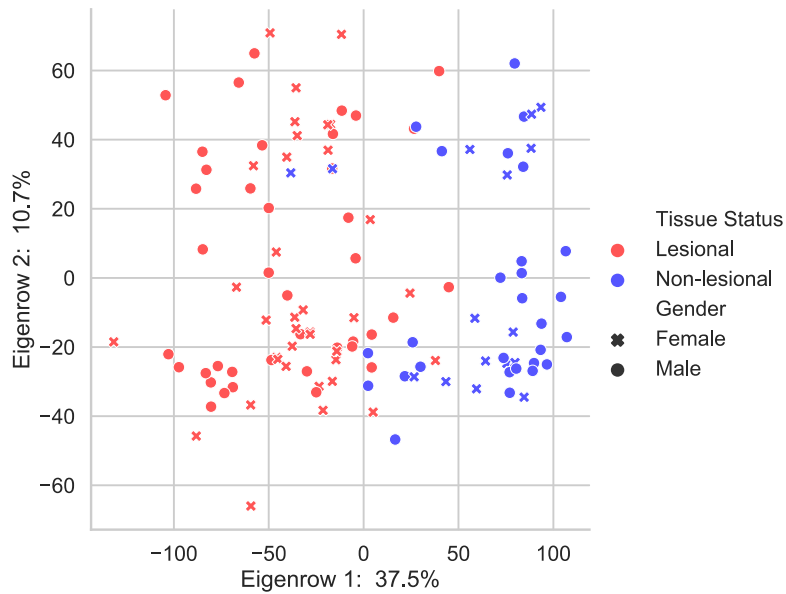

Figure S5: Combined vs BCH vs BWH (Q<0.05 and FC>+/-2)

A

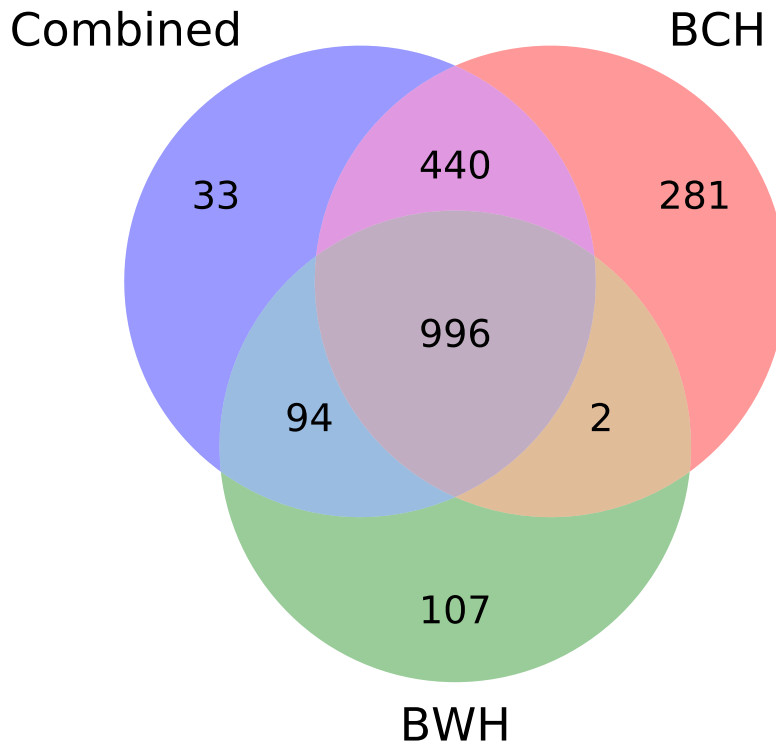

# Figure S6: qPCR validation of AQP8 and MMP7

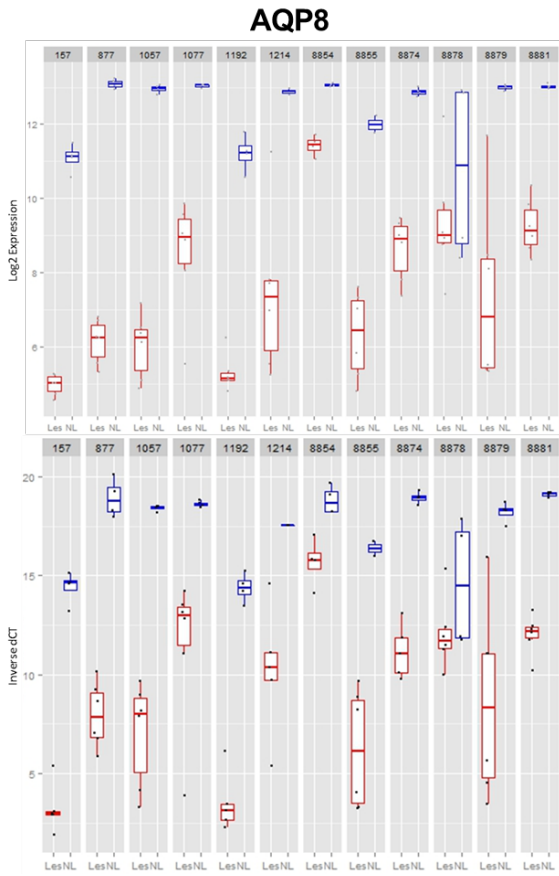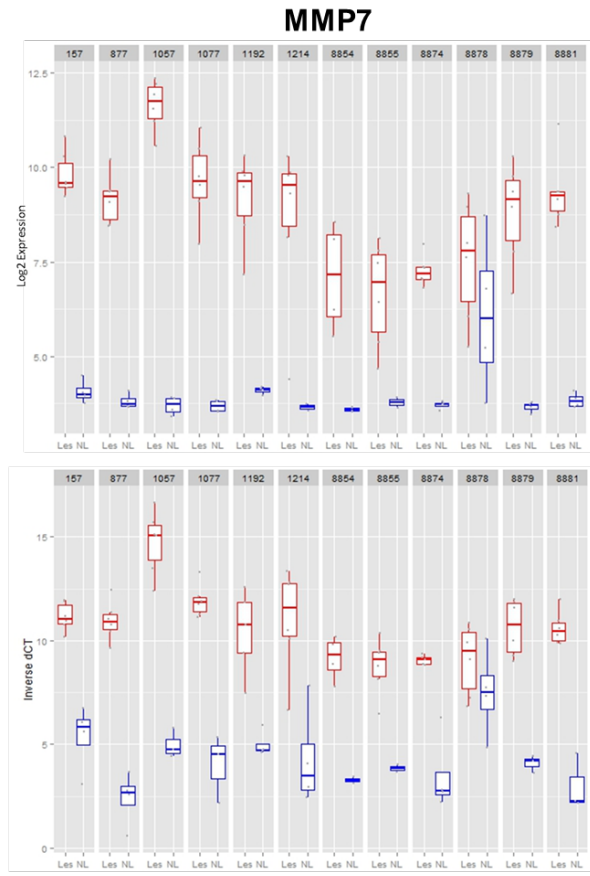

Array

qPCR
